# Supplementary material
Source: publisher site journal article supplement (https://www.dovepress.com/article/364381)
Supplement: Supplementary file 1 [file get_supplementary_file.php]

**Supplementary Table 1.** Proteomic identification of serum proteins on the corona of nanoparticles (Neu Nano-UCAs). The protein quantitative data have been transformed to a logarithmic scale (Log2) and have been normalized (Global median normalization).

| Proteins | Accession n | serum1 | serum2 | serum3 | Amino acid coverage (%) | Match score | Missed cleaves (%) | Peptide counts (all) | Peptide counts (unique) |
| --- | --- | --- | --- | --- | --- | --- | --- | --- | --- |
| Complement C3 | P01024 | 5.31 | 5.56 | 5.84 | 37.80 | 323.31 | 14.63 | 103 | 103 |
| Immunoglobulin gamma-1 heavy chain | P0DOX5 | 5.34 | 5.12 | 6.14 | 40.80 | 323.31 | 0.00 | 14 | 9 |
| Immunoglobulin heavy constant alpha 1 | P01876 | 4.85 | 5.70 | 5.85 | 45.20 | 237.18 | 30.00 | 13 | 8 |
| Complement component C9 | P02748 | 5.05 | 4.69 | 5.61 | 52.80 | 220.75 | 0.00 | 25 | 23 |
| Serotransferrin | P02787 | 4.99 | 4.60 | 5.54 | 55.70 | 11.24 | 0.00 | 45 | 45 |
| Immunoglobulin heavy constant gamma 2 | P01859 | 4.34 | 4.69 | 5.43 | 56.20 | 323.31 | 21.05 | 11 | 5 |
| Immunoglobulin kappa light chain | P0DOX7 | 4.24 | 3.88 | 5.24 | 63.90 | 323.31 | 35.48 | 9 | 2 |
| Complement C5 | P01031 | 4.21 | 3.86 | 4.98 | 34.70 | 226.38 | 50.00 | 54 | 54 |
| Alpha-2-macroglobulin | P01023 | 2.38 | 4.66 | 5.87 | 86.90 | 21.73 | 50.00 | 46 | 41 |
| Immunoglobulin heavy constant mu | P01871 | 4.17 | 4.02 | 4.71 | 33.90 | 323.31 | 24.13 | 17 | 3 |
| Alpha-1-antitrypsin | P01009 | 4.16 | 4.30 | 4.38 | 43.50 | 323.31 | 17.50 | 20 | 20 |
| Apolipoprotein A-I | P02647 | 4.28 | 3.87 | 4.25 | 52.30 | 323.31 | 23.53 | 17 | 17 |
| Immunoglobulin lambda constant 3 | P0DOY3 | 3.68 | 3.78 | 4.71 | 25.20 | 323.31 | 50.00 | 4 | 1 |
| Apolipoprotein E | P02649 | 3.90 | 3.49 | 4.62 | 46.60 | 201.95 | 20.00 | 19 | 19 |
| Apolipoprotein A-IV | P06727 | 3.77 | 3.27 | 4.49 | 41.90 | 152.17 | 11.11 | 31 | 31 |
| Immunoglobulin lambda-1 light chain | P0DOX8 | 3.55 | 3.69 | 4.23 | 26.80 | 323.31 | 0.00 | 7 | 4 |
| Immunoglobulin kappa constant | P01834 | 3.91 | 3.26 | 3.78 | 55.00 | 323.31 | 30.00 | 8 | 2 |
| Complement component C6 | P13671 | 3.14 | 3.27 | 3.91 | 39.00 | 139.29 | 38.89 | 29 | 29 |
| Complement factor H | P08603 | 3.52 | 3.29 | 3.41 | 36.00 | 323.31 | 20.00 | 46 | 38 |
| Complement component C7 | P10643 | 3.19 | 2.96 | 3.77 | 25.50 | 61.55 | 9.09 | 34 | 34 |
| Clusterin | P10909 | 2.75 | 2.98 | 3.34 | 34.20 | 323.31 | 0.00 | 14 | 14 |
| Immunoglobulin kappa variable 3-20 | P01619 | 3.25 | 2.74 | 3.06 | 26.00 | 323.31 | 22.73 | 5 | 3 |
| Haptoglobin | P00738 | 5.31 | 5.56 | 5.84 | 37.80 | 323.31 | 14.63 | 17 | 9 |
| Complement C4-B | P0C0L5 | 5.34 | 5.12 | 6.14 | 40.80 | 323.31 | 0.00 | 47 | 2 |
| Complement component C8 gamma chain | P07360 | 4.85 | 5.70 | 5.85 | 45.20 | 237.18 | 30.00 | 10 | 10 |
| Antithrombin-III | P01008 | 5.05 | 4.69 | 5.61 | 52.80 | 220.75 | 0.00 | 18 | 18 |
| Complement component C8 beta chain | P07358 | 4.99 | 4.60 | 5.54 | 55.70 | 11.24 | 0.00 | 20 | 20 |
| Hemopexin | P02790 | 4.34 | 4.69 | 5.43 | 56.20 | 323.31 | 21.05 | 11 | 11 |
| Immunoglobulin heavy constant gamma 3 | P01860 | 4.24 | 3.88 | 5.24 | 63.90 | 323.31 | 35.48 | 9 | 4 |
| Ceruloplasmin | P00450 | 4.21 | 3.86 | 4.98 | 34.70 | 226.38 | 50.00 | 22 | 22 |
